# Supplementary material for: Water Quality Based Multi-objective Optimal Design of Water Distribution Systems
Source: Springer Nature journal article supplement (doi:10.1007/s11269-016-1512-6), 2016-10-13
Supplement: MOESM1 [file 11776530]

**Appendix 1:**

**Case Study: Jahrom WDS**

Jahrom is a city located in the south of Iran and its WDS was selected to examine the proposed algorithm. The WDS of Jahrom consists of three isolated zones. The population of Jahrom is 124,000 and the population of Zone three is 5,000. Zone three is chosen to examine the proposed algorithm. Figure A1-1 shows the configuration of Jahrom WDS (Zone three) and Figure A1-2 shows the diurnal demand curve in Jahrom WDS. Tables A1-1 and A1-2 show characteristic of nodes and pipes in Jahrom WDS.


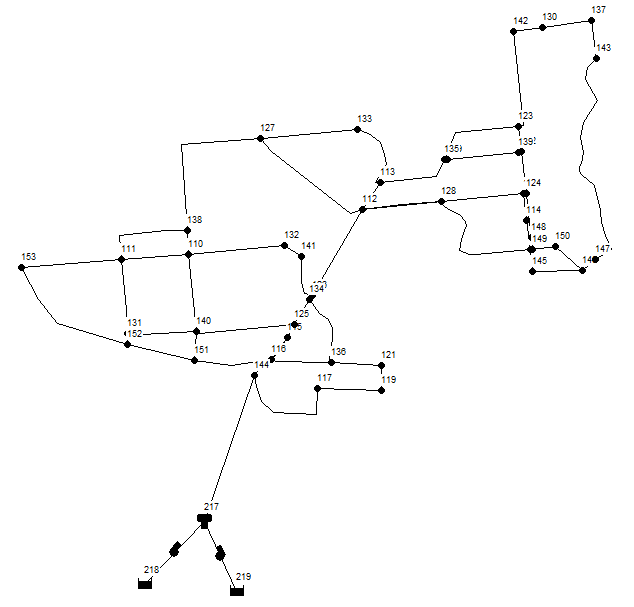


**Figure A1-1:** Layout of the Jahrom WDS

**Figure A1-2:** Diurnal demand curve in Jahrom WDS

This network includes 62 pipes and 44 nodes. 20% of pipes in Jahrom WDS are AC and the rest are PE. The total length of pipes is 9637m. FigureA1-3 shows histogram of pipe length in Jahrom WDS. The linkage between two nodes when the diameter is fixed, is considered as a pipe in this study. Regarding the total length of pipes and number of pipes considered in simulation, the average length of pipes is 155m.

**Figure A1-3:** Histogram of pipe length in Jahrom WDS

Table A1-1 (Supplemental Data): Characteristic of nodes in Jahrom WDS

| ID | Elevation(m) | Demand(lit/s) | ID | Elevation(m) | Demand(lit/s) |
| --- | --- | --- | --- | --- | --- |
| 110 | 1094.55 | 0.564 | **132** | 1099.36 | 0.674 |
| 111 | 1089.88 | 2.718 | **133** | 1087.80 | 1.310 |
| 112 | 1095.18 | 0.749 | **134** | 1104.91 | 0.152 |
| 113 | 1092.42 | 0.352 | **135** | 1089.74 | 0.413 |
| 114 | 1100.45 | 0.277 | **136** | 1112.00 | 0.277 |
| 115 | 1106.98 | 0.174 | **137** | 1081.06 | 0.215 |
| 116 | 1106.43 | 0.826 | **138** | 1093.84 | 1.057 |
| 117 | 1113.27 | 1.055 | **139** | 1093.40 | 0.152 |
| 118 | 1103.00 | 0.153 | **140** | 1098.37 | 1.063 |
| 119 | 1113.00 | 1.537 | **141** | 1100.87 | 0.287 |
| 120 | 1097.33 | 0.164 | **142** | 1081.60 | 0.818+10.0* |
| 121 | 1113.00 | 1.054 | **143** | 1085.04 | 0.619 |
| 122 | 1093.58 | 0.344 | **144** | 1108.00 | 0.000 |
| 123 | 1090.69 | 0.676 | **145** | 1107.00 | 1.954 |
| 124 | 1097.50 | 0.317 | **146** | 1108.00 | 1.661 |
| 125 | 1106.33 | 0.211 | **147** | 1107.00 | - |
| 126 | 1105.29 | 0.374 | **148** | 1100.00 | - |
| 127 | 1088.25 | 1.392 | **149** | 1103.00 | 0.098 |
| 128 | 1097.09 | 0.818 | **150** | 1105.00 | - |
| 129 | 1089.95 | 0.347 | **151** | 1098.00 | - |
| 130 | 1082.11 | 0.293 | **152** | 1090.00 | - |
| 131 | 1094.25 | 4.341 | **153** | 1083.00 | - |

* 10 (lit/s) is added to node 142 in case of firefighting demand (according to the actual design)
